# Supplementary material for: Effectiveness of the BNT162b2 mRNA Vaccine Compared with Hybrid Immunity in Populations Prioritized and Non-Prioritized for COVID-19 Vaccination in 2021–2022: A Naturalistic Case-Control Study in Sweden
Source: MDPI journal article supplement (doi:10.3390/vaccines10081273), 2022-08-07
Supplement: s1 [file s1]

**Supplementary Table S1.** Total vaccinated population by 31 July 2021. Age and sex for the population vaccinated with the BNT162b2 vaccine and the proportions for the corresponding fraction of the total adult population in Östergötland, Jönköping, and Skåne counties, Sweden ( $n = 576,526$ ).

| Age             | Women      |    |                 | Men        |    |                 | Total      |     |                 |
|-----------------|------------|----|-----------------|------------|----|-----------------|------------|-----|-----------------|
|                 | Vaccinated |    | All adults<br>% | Vaccinated |    | All adults<br>% | Vaccinated |     | All adults<br>% |
|                 | <i>n</i>   | %  |                 | <i>n</i>   | %  |                 | <i>n</i>   | %   |                 |
| 18–39 years     | 31,188     | 5  | 2               | 18,504     | 3  | 1               | 49,692     | 9   | 3               |
| Prioritized     | 14,812     | 3  | 1               | 6865       | 1  | 0               | 21,677     | 4   | 1               |
| Non-prioritized | 16,376     | 3  | 1               | 11,639     | 2  | 1               | 28,015     | 5   | 2               |
| 40–64 years     | 124,679    | 22 | 7               | 121,930    | 21 | 7               | 246,609    | 43  | 14              |
| Prioritized     | 54,147     | 9  | 3               | 38,607     | 7  | 2               | 92,754     | 16  | 5               |
| Non-prioritized | 70,532     | 12 | 4               | 83,323     | 14 | 5               | 153,855    | 27  | 9               |
| 65–79 years     | 97,870     | 17 | 6               | 89,739     | 16 | 5               | 187,609    | 33  | 11              |
| Prioritized     | 90,473     | 16 | 5               | 82,886     | 14 | 5               | 173,359    | 30  | 10              |
| Non-prioritized | 7397       | 1  | 0               | 6853       | 1  | 0               | 14,250     | 2   | 1               |
| 80+ years       | 54,433     | 9  | 3               | 38,183     | 7  | 2               | 92,616     | 16  | 5               |
| Prioritized     | 56,639     | 9  | 3               | 37,737     | 7  | 2               | 91,376     | 16  | 5               |
| Non-prioritized | 794        | 0  | 0               | 446        | 0  | 0               | 1240       | 0   | 0               |
| Total           | 308,170    | 53 | 18              | 268,356    | 47 | 15              | 576,526    | 100 | 33              |
| Prioritized     | 213,071    | 37 | 12              | 166,095    | 29 | 9               | 379,166    | 66  | 22              |
| Non-prioritized | 95,099     | 16 | 5               | 102,261    | 18 | 6               | 197,360    | 34  | 11              |
